# Supplementary material for: Alzheimer’s Disease: Key Insights from Two Decades of Clinical Trial Failures
Source: PubMed Central journal article supplement — J Alzheimers Dis. 2022 May 3;87(1):83–100. doi: 10.3233/JAD-215699 (PMC9198803; doi:10.3233/jad-215699), 2022-05-03
Supplement: jad-87-jad215699-s001.pdf [file jad-87-jad215699-s001.pdf]

# Supplementary Material

## Alzheimer's Disease: Key Insights from Two Decades of Clinical Trial Failures

**Supplementary Table 1.** Details of the 40 unique phase 3 compound failures from 2004 to the present.

| Failure Year                                                                                                                                                        | Clinical Trial # | Ph     | Target AD Patients | Clinical Trial Design                                          | Primary Clinical Endpoint | Biomarker: Inclusion / Exclusion Criteria       | Biomarker: Efficacy Evaluation                                                            | Results and Notes                                                        | Main Sponsor                        |
|---------------------------------------------------------------------------------------------------------------------------------------------------------------------|------------------|--------|--------------------|----------------------------------------------------------------|---------------------------|-------------------------------------------------|-------------------------------------------------------------------------------------------|--------------------------------------------------------------------------|-------------------------------------|
| <b>2020. Solanezumab (LY2062430). A<math>\beta</math> plaque formation - immunotherapy to remove soluble A<math>\beta</math></b>                                    |                  |        |                    |                                                                |                           |                                                 |                                                                                           |                                                                          |                                     |
|                                                                                                                                                                     | NCT04623242      | II/III | familial AD        | 194 pts, 18-80 y, >208 wk, 4 arms (includes gantenerumab arms) | DIAN-MCE ^                | genetic, MRI                                    | MRI, PET (A $\beta$ , tau, glucose), CSF (A $\beta$ , tau, NfL), plasma (A $\beta$ , NfL) | no significant efficacy [1]                                              | Washington Univ. School of Medicine |
|                                                                                                                                                                     | NCT00905372      | III    | mild-moderate      | 1,012 pts, 55+ y, 80 wk, 2 arms                                | ADAS-Cog, ADCS-ADL        | MRI or CT                                       | MRI, plasma (A $\beta$ )                                                                  | no significant efficacy [2, 3]                                           | Eli Lilly                           |
|                                                                                                                                                                     | NCT00904683      | III    | mild-moderate      | 1,040 pts, 55+ y, 80 wk, 2 arms                                | ADAS-Cog                  | MRI or CT                                       | MRI, plasma (A $\beta$ )                                                                  | no significant efficacy [2, 3]                                           | Eli Lilly                           |
|                                                                                                                                                                     | NCT01900665      | III    | mild               | 2,129 pts, 55-90 y, 80 wk, 2 arms                              | ADAS-Cog                  | MRI or CT, PET (A $\beta$ ) or CSF (A $\beta$ ) | MRI, plasma (A $\beta$ ), PET (A $\beta$ ), CSF (A $\beta$ )                              | trial terminated, no efficacy [4]                                        | Eli Lilly                           |
|                                                                                                                                                                     | NCT02760602      | III    | prodromal          | 26 pts (aiming for 2,450), 55-85 y, 24 mo, 2 arms              | ADAS-Cog                  | MRI or CT, PET (A $\beta$ ) or CSF (A $\beta$ ) | MRI, PET (A $\beta$ , tau), CSF (A $\beta$ , tau), plasma (A $\beta$ )                    | trial terminated, due to failure in other Ph III trials                  | Eli Lilly                           |
| <b>2020. Gantenerumab (RO4909832, RG1450). A<math>\beta</math> plaque clearance - immunotherapy for aggregated A<math>\beta</math> peptides</b>                     |                  |        |                    |                                                                |                           |                                                 |                                                                                           |                                                                          |                                     |
|                                                                                                                                                                     | NCT04623242      | II/III | familial AD        | 194 pts, 18-80 y, >208 wk, 4 arms (includes solanezumab arms)  | DIAN-MCE ^                | genetic, MRI                                    | MRI, PET (A $\beta$ , tau, glucose), CSF (A $\beta$ , tau, NfL), plasma (A $\beta$ , NfL) | no significant efficacy [5]                                              | Washington Univ. School of Medicine |
|                                                                                                                                                                     | NCT01224106      | III    | prodromal          | 797 pts, 50-85 y, 104 wk, 5 arms                               | CDR-SB                    | none reported                                   | CSF (A $\beta$ , tau), MRI, APOE                                                          | trial terminated based on futility analysis, no significant efficacy [6] | Roche                               |
| <b>2019. Elenbecestat (E2609). A<math>\beta</math> production - BACE inhibitor</b>                                                                                  |                  |        |                    |                                                                |                           |                                                 |                                                                                           |                                                                          |                                     |
|                                                                                                                                                                     | NCT02956486      | III    | early (MCI-mild)   | 2,212 pts, 50-85 y, 24 mo, 3 arms                              | CDR-SB                    | PET (A $\beta$ ) or/and CSF (A $\beta$ ), MRI   | PET (A $\beta$ )                                                                          | terminated early due to unfavorable risk/benefit, discontinued [7, 8]    | Eisai                               |
| <b>2019. Crenezumab (MABT5102A, RG7412, RO5490245). A<math>\beta</math> plaque formation - targets soluble and possibly aggregated A<math>\beta</math> peptides</b> |                  |        |                    |                                                                |                           |                                                 |                                                                                           |                                                                          |                                     |
|                                                                                                                                                                     | NCT02670083      | III    | prodromal-mild     | 813 pts, 50-85 y, 100 wk, 2 arms                               | CDR-SB                    | CSF (A $\beta$ ) or PET (A $\beta$ ), MRI       | plasma (A $\beta$ ), MRI, genetic                                                         | terminated early based on futility analysis [9]                          | Roche                               |
|                                                                                                                                                                     | NCT03114657      | III    | prodromal-mild     | 806 pts, 50-85 y, 100 wk, 2 arms                               | CDR-SB                    | CSF (A $\beta$ ) or PET (A $\beta$ ), MRI       | plasma (A $\beta$ ), MRI, genetic                                                         | terminated early based on futility analysis [9]                          | Roche                               |

| Failure Year                                                                                             | Clinical Trial # | Ph     | Target AD Patients                                                  | Clinical Trial Design                                          | Primary Clinical Endpoint                       | Biomarker: Inclusion / Exclusion Criteria               | Biomarker: Efficacy Evaluation                                 | Results and Notes                                                                            | Main Sponsor |
|----------------------------------------------------------------------------------------------------------|------------------|--------|---------------------------------------------------------------------|----------------------------------------------------------------|-------------------------------------------------|---------------------------------------------------------|----------------------------------------------------------------|----------------------------------------------------------------------------------------------|--------------|
| <b>2019. Amilomotide (CAD106). A<math>\beta</math> vaccine</b> – active immunotherapy to elicit antibody |                  |        |                                                                     |                                                                |                                                 |                                                         |                                                                |                                                                                              |              |
|                                                                                                          | NCT02565511      | II/III | asymptomatic at-risk ( <i>APOE</i> genotype) pts                    | 480 pts, 60-75 y, 60-90 mo, 4 arms (includes umibecestat arms) | time to onset of MCI/ dementia due to AD, APCC  | MRI, <i>APOE</i>                                        | PET (A $\beta$ , tau), CSF (A $\beta$ , tau), serum (NfL), MRI | trial terminated based on futility analysis, program retired [10]                            | Novartis     |
| <b>2019. Umibecestat (CNP520). A<math>\beta</math> production</b> - BACE inhibitor                       |                  |        |                                                                     |                                                                |                                                 |                                                         |                                                                |                                                                                              |              |
|                                                                                                          | NCT02565511      | II/III | asymptomatic at-risk ( <i>APOE</i> genotype) pts                    | 480 pts, 60-75 y, 60-90 mo, 4 arms (includes amilomotide arms) | time to onset of MCI/ dementia due to AD, APCC  | MRI, <i>APOE</i>                                        | PET (A $\beta$ , tau), CSF (A $\beta$ , tau), serum (NfL), MRI | trial terminated based on futility analysis, worsening of cognition, discontinued [11]       | Novartis     |
|                                                                                                          | NCT03131453      | II/III | asymptomatic at-risk ( <i>APOE</i> genotype) pts                    | 1,145 pts, 60-75 y, 60-84 mo, 3 arms                           | time to onset of MCI / dementia due to AD, APCC | MRI, <i>APOE</i>                                        | PET (A $\beta$ , tau), CSF (A $\beta$ , tau), serum (NfL), MRI | worsening of cognition, discontinued [11]                                                    | Novartis     |
| <b>2018. Azeliragon (TTP488, PF-04494700). Inflammation</b> - RAGE antagonist                            |                  |        |                                                                     |                                                                |                                                 |                                                         |                                                                |                                                                                              |              |
|                                                                                                          | NCT02080364      | III    | mild                                                                | 880 pts, 50+ y, 18 mo, 2 arms                                  | ADAS-Cog, CDR-SB                                | MRI                                                     | MRI, PET (glucose)                                             | no significant efficacy [12]                                                                 | vTv          |
| <b>2018. Atabecestat (JNJ-54861911). A<math>\beta</math> production</b> - BACE inhibitor                 |                  |        |                                                                     |                                                                |                                                 |                                                         |                                                                |                                                                                              |              |
|                                                                                                          | NCT02569398      | II/III | asymptomatic A $\beta$ positive at-risk ( <i>APOE</i> genotype) pts | 557 pts, 60-85 y, 54 mo, 3 arms                                | PACC *                                          | <i>APOE</i> , CSF (A $\beta$ ) or PET (A $\beta$ ), MRI | none reported                                                  | trial terminated due to benefit/risk profile, no efficacy, liver toxicity, discontinued [13] | Janssen      |
| <b>2018. Lanabecestat (AZD3293, LY3314814). A<math>\beta</math> production</b> - BACE inhibitor          |                  |        |                                                                     |                                                                |                                                 |                                                         |                                                                |                                                                                              |              |
|                                                                                                          | NCT02245737      | II/III | prodromal-mild                                                      | 2,218 pts, 55-85 y, 104 wk, 3 arms                             | ADAS-Cog                                        | PET (A $\beta$ ) or CSF (A $\beta$ )                    | CSF (A $\beta$ , tau), PET (A $\beta$ , tau, glucose), MRI     | trial terminated based on futility analysis, no significant efficacy, discontinued [14, 15]  | AstraZeneca  |
|                                                                                                          | NCT02783573      | III    | mild                                                                | 1,722 pts, 55-85 y, 78 wk, 4 arms                              | ADAS-Cog                                        | none reported                                           | CSF (A $\beta$ , tau), PET (A $\beta$ ), MRI, rCBF             | trial terminated based on futility analysis, no significant efficacy, discontinued [14, 15]  | AstraZeneca  |
| <b>2018. Verubecestat (MK-8931). A<math>\beta</math> production</b> - BACE inhibitor                     |                  |        |                                                                     |                                                                |                                                 |                                                         |                                                                |                                                                                              |              |
|                                                                                                          | NCT01739348      | II/III | mild-moderate                                                       | 1,958 pts, 55-85 y, 78 wk, 4 arms                              | ADAS-Cog, ADCS-ADL                              | MRI or CT                                               | PET (A $\beta$ ), CSF (A $\beta$ , tau), <i>APOE</i>           | trial terminated based on futility analysis, no efficacy, adverse events [16-18]             | Merck        |
|                                                                                                          | NCT01953601      | III    | prodromal                                                           | 1,454 pts, 50-85 y, 104 wk, 3 arms                             | CDR-SB                                          | PET (A $\beta$ ) or CSF (A $\beta$ , tau), MRI or CT    | MRI, PET (A $\beta$ ), CSF (A $\beta$ , tau)                   | trial terminated based on futility analysis, some pts performed worse [18, 19]               | Merck        |

| Failure Year                                                                                                                                                           | Clinical Trial # | Ph     | Target AD Patients       | Clinical Trial Design                         | Primary Clinical Endpoint | Biomarker: Inclusion / Exclusion Criteria | Biomarker: Efficacy Evaluation                                                                          | Results and Notes                                                                            | Main Sponsor         |
|------------------------------------------------------------------------------------------------------------------------------------------------------------------------|------------------|--------|--------------------------|-----------------------------------------------|---------------------------|-------------------------------------------|---------------------------------------------------------------------------------------------------------|----------------------------------------------------------------------------------------------|----------------------|
| <b>2018. Pioglitazone (AD4833). Energy utilization</b> - marketed diabetes medication and insulin sensitizer, binds PPAR $\gamma$ , possible anti-inflammatory effects |                  |        |                          |                                               |                           |                                           |                                                                                                         |                                                                                              |                      |
|                                                                                                                                                                        | NCT01931566      | III    | asymptomatic at-risk pts | 3,494 pts, 65-83 y, up to 5 y, 3 arms         | time to MCI-AD ^^         | genetic                                   | <i>APOE</i>                                                                                             | trial terminated based on futility, lack of efficacy [20]                                    | Takeda               |
| <b>2018. Nilvadipine (ARC029). Vascular burden</b> - marketed calcium channel blocker to treat hypertension, increases cerebral blood flow                             |                  |        |                          |                                               |                           |                                           |                                                                                                         |                                                                                              |                      |
|                                                                                                                                                                        | NCT02017340      | III    | mild-moderate            | 511 pts, 50+ y, 18 mo, 2 arms                 | ADAS-Cog                  | none reported                             | none reported in this study; discussions of various biomarkers in parallel study but no further details | no significant efficacy [21]                                                                 | St. James's Hospital |
| <b>2017. Tricaprilin (AC-1204). Energy utilization</b> - induction of mild chronic ketosis to improve mitochondrial metabolism                                         |                  |        |                          |                                               |                           |                                           |                                                                                                         |                                                                                              |                      |
|                                                                                                                                                                        | NCT01741194      | II/III | mild-moderate            | 418 pts, 66-90 y, 26 wk, 2 arms               | ADAS-Cog                  | MRI or CT, <i>APOE</i>                    | none reported                                                                                           | no significant efficacy, failure due to new formulation [22]                                 | Cerecin              |
| <b>2017. Idalopirdine (LY483518, SGS518, Lu AE58054). Symptomatic</b> - 5-HT 6 receptor antagonist                                                                     |                  |        |                          |                                               |                           |                                           |                                                                                                         |                                                                                              |                      |
|                                                                                                                                                                        | NCT01955161      | III    | mild-moderate            | 933 pts, 50+ y, 24 wk, 3 arms                 | ADAS-Cog                  | none reported                             | none reported                                                                                           | no significant efficacy, discontinued [23, 23]                                               | Lundbeck             |
|                                                                                                                                                                        | NCT02006641      | III    | mild-moderate            | 858 pts, 50+ y, 24 wk, 3 arms                 | ADAS-Cog                  | none reported                             | none reported                                                                                           | no significant efficacy, discontinued [23, 23]                                               | Lundbeck             |
|                                                                                                                                                                        | NCT02006654      | III    | mild-moderate            | 734 pts, 50+ y, 24 wk, 2 arms                 | ADAS-Cog                  | none reported                             | none reported                                                                                           | no significant efficacy, discontinued [23, 23]                                               | Lundbeck             |
| <b>2017. Intepirdine (RVT-101, SB 742457, GSK 742457). Symptomatic</b> - 5-HT 6 receptor antagonist                                                                    |                  |        |                          |                                               |                           |                                           |                                                                                                         |                                                                                              |                      |
|                                                                                                                                                                        | NCT02585934      | III    | mild-moderate            | 1,315 pts, 50-85 y, 24 wk, 2 arms             | ADAS-Cog, ADCS-ADL        | none reported                             | none reported                                                                                           | no significant efficacy, discontinued [25, 26]                                               | Axovant              |
| <b>2017. SK-PC-B70M. Neuroprotectant / Antioxidant</b> – neuroprotective against cytotoxicity induced by A $\beta$ <sub>42</sub> , MOA not well defined                |                  |        |                          |                                               |                           |                                           |                                                                                                         |                                                                                              |                      |
|                                                                                                                                                                        | NCT01249196      | III    | mild-moderate            | 256 pts, 55-85 y, duration not stated, 4 arms | ADAS-Cog                  | MRI                                       | none reported                                                                                           | discontinued [27]                                                                            | SK Chemicals         |
| <b>2016. TRx0237 (LMTM, LMT-X, Methylene Blue). Tau</b> – inhibitor of tau aggregation or removal of existing aggregates                                               |                  |        |                          |                                               |                           |                                           |                                                                                                         |                                                                                              |                      |
|                                                                                                                                                                        | NCT01689246      | III    | mild-moderate            | 891 pts, <90 y, 15 mo, 3 arms                 | ADAS-Cog, ADCS-ADL        | MRI                                       | PET (glucose), MRI, CSF (A $\beta$ , tau), <i>APOE</i>                                                  | no significant efficacy [28, 29]                                                             | TauRx                |
|                                                                                                                                                                        | NCT01689233      | III    | mild                     | 800 pts, <90 y, 18 mo, 2 arms                 | ADAS-Cog, ADCS-ADL        | MRI                                       | MRI, PET (glucose), CSF (A $\beta$ , tau), <i>APOE</i>                                                  | disputes about data presentation, but generally thought to have no significant efficacy [29] | TauRx                |
| <b>2015. Encenicline (EVP-6124, MT-4666). Symptomatic</b> - partial selective agonist of nicotinic ACh receptor                                                        |                  |        |                          |                                               |                           |                                           |                                                                                                         |                                                                                              |                      |
|                                                                                                                                                                        | NCT01969123      | III    | mild-moderate            | 474 pts, 55-85 y, 26 wk, 3 arms               | ADAS-Cog, CDR-SB          | MRI or CT                                 | none reported                                                                                           | trial terminated, discontinued [30]                                                          | Forum                |

| Failure Year                                                                                                                                                                                          | Clinical Trial # | Ph     | Target AD Patients                                   | Clinical Trial Design                             | Primary Clinical Endpoint        | Biomarker: Inclusion / Exclusion Criteria | Biomarker: Efficacy Evaluation                                                         | Results and Notes                                                                 | Main Sponsor             |
|-------------------------------------------------------------------------------------------------------------------------------------------------------------------------------------------------------|------------------|--------|------------------------------------------------------|---------------------------------------------------|----------------------------------|-------------------------------------------|----------------------------------------------------------------------------------------|-----------------------------------------------------------------------------------|--------------------------|
|                                                                                                                                                                                                       | NCT01969136      | III    | mild-moderate                                        | 403 pts, 55-85 y, 26 wk, 3 arms                   | ADAS-Cog, CDR-SB                 | MRI or CT                                 | none reported                                                                          | trial terminated, discontinued [30]                                               | Forum                    |
| <b>2013. Immunoglobulin (IGIV). A<math>\beta</math> plaque formation</b> - marketed for immune deficiencies, immunotherapy of polyclonal antibodies directed against A $\beta$                        |                  |        |                                                      |                                                   |                                  |                                           |                                                                                        |                                                                                   |                          |
|                                                                                                                                                                                                       | NCT00818662      | III    | mild-moderate                                        | 390 pts, 50-89 y, 18 mo, 4 arms                   | ADAS-Cog, ADCS-ADL               | MRI or CT                                 | MRI, plasma / serum (A $\beta$ ), CSF (A $\beta$ , tau), PET (A $\beta$ ), <i>APOE</i> | no significant efficacy [31, 32]                                                  | Takeda                   |
|                                                                                                                                                                                                       | NCT01524887      | III    | mild-moderate                                        | 508 pts, 50-89 y, 18 mo, 3 arms                   | ADAS-Cog, ADCS-ADL               | MRI or CT                                 | MRI                                                                                    | trial terminated due to other Ph 3 failure [32]                                   | Takeda                   |
| <b>2013. Semagacestat (LY450139). A<math>\beta</math> production</b> - $\gamma$ -secretase inhibitor                                                                                                  |                  |        |                                                      |                                                   |                                  |                                           |                                                                                        |                                                                                   |                          |
|                                                                                                                                                                                                       | NCT00594568      | III    | mild-moderate                                        | 1,537 pts, 55+ y, 76 wk, 3 arms                   | ADAS-Cog, ADCS-ADL               | MRI or CT                                 | PET (glucose, A $\beta$ ), MRI, CSF (tau, A $\beta$ ), plasma (A $\beta$ )             | trial terminated, some pts performed worse, adverse events, discontinued [33, 34] | Eli Lilly                |
|                                                                                                                                                                                                       | NCT00762411      | III    | mild-moderate                                        | 1,111 pts, 55+ y, 76 wk, 2 arms                   | ADAS-Cog, ADCS-ADL               | MRI or CT                                 | PET (glucose, A $\beta$ ), MRI, CSF (tau, A $\beta$ ), plasma (A $\beta$ )             | discontinued [34]                                                                 | Eli Lilly                |
| <b>2013. Thalidomide. Inflammation</b> - marketed for immunological and inflammatory disorders and cancer, anti-inflammatory effect via TNF $\alpha$                                                  |                  |        |                                                      |                                                   |                                  |                                           |                                                                                        |                                                                                   |                          |
|                                                                                                                                                                                                       | NCT01094340      | II/III | mild-moderate                                        | 25 pts (185 pre-screened), 50-90 y, 24 wk, 2 arms | ADAS-Cog, CDR-SB, MMSE, ADCS-ADL | MRI or CT                                 | CSF & blood mentioned, but no further details                                          | no significant efficacy, poor tolerability [35]                                   | Banner                   |
| <b>2013. Doxycycline, Rifampicin</b> (alone or in combination). <b>Inflammation</b> - marketed antibiotics, may decrease neuroinflammation, reduce amyloid and tau accumulation, reduce neurotoxicity |                  |        |                                                      |                                                   |                                  |                                           |                                                                                        |                                                                                   |                          |
|                                                                                                                                                                                                       | NCT00439166      | III    | mild-moderate                                        | 406 pts, 50+ y, 12 mo, 4 arms                     | ADAS-Cog, CDR-SB                 | none reported                             | CSF (tau, A $\beta$ ),                                                                 | worsening of cognitive function [36]                                              | Hamilton Health Sciences |
| <b>2012. Bapineuzumab (AAB-001). A<math>\beta</math> plaque formation</b> - immunotherapy for soluble A $\beta$ peptides, and may clear A $\beta$ plaques                                             |                  |        |                                                      |                                                   |                                  |                                           |                                                                                        |                                                                                   |                          |
|                                                                                                                                                                                                       | NCT00575055      | III    | mild-moderate, <i>APOE</i> $\epsilon$ 4 carriers     | 1,121 pts, 50-88 y, 18 mo, 3 arms                 | ADAS-Cog, DAD                    | MRI, <i>APOE</i>                          | PET (A $\beta$ ), CSF (tau), MRI                                                       | no significant efficacy, discontinued [37-39]                                     | Janssen                  |
|                                                                                                                                                                                                       | NCT00574132      | III    | mild-moderate, <i>APOE</i> $\epsilon$ 4 non-carriers | 1,331 pts, 50-88 y, 18 mo, 3 arms                 | ADAS-Cog, DAD                    | MRI, <i>APOE</i>                          | PET (A $\beta$ ), CSF (tau), MRI                                                       | no significant efficacy, discontinued [37-39]                                     | Janssen                  |
|                                                                                                                                                                                                       | NCT00676143      | III    | mild-moderate, <i>APOE</i> $\epsilon$ 4 carriers     | 683 pts, 50-88 y, 18 mo, 3 arms                   | ADAS-Cog, DAD                    | MRI, <i>APOE</i>                          | PET (A $\beta$ ), CSF (tau), plasma (A $\beta$ ), MRI                                  | trial terminated due other Ph 3 failures, discontinued [39, 40]                   | Pfizer                   |
|                                                                                                                                                                                                       | NCT00667810      | III    | mild-moderate, <i>APOE</i> $\epsilon$ 4 non-carriers | 329 pts, 50-88 y, 18 mo, 3 arms                   | ADAS-Cog, DAD                    | MRI, <i>APOE</i>                          | PET (A $\beta$ ), CSF (tau), plasma (A $\beta$ ), MRI                                  | trial terminated due other Ph 3 failures, discontinued [39, 40]                   | Pfizer                   |
| <b>2012. Ginkgo biloba. Neuroprotective / Antioxidant</b> - antioxidant activity by reducing oxidative damage                                                                                         |                  |        |                                                      |                                                   |                                  |                                           |                                                                                        |                                                                                   |                          |

| Failure Year                                                                                                                                                                                                   | Clinical Trial # | Ph     | Target AD Patients                         | Clinical Trial Design                                               | Primary Clinical Endpoint | Biomarker: Inclusion / Exclusion Criteria | Biomarker: Efficacy Evaluation | Results and Notes                                               | Main Sponsor       |
|----------------------------------------------------------------------------------------------------------------------------------------------------------------------------------------------------------------|------------------|--------|--------------------------------------------|---------------------------------------------------------------------|---------------------------|-------------------------------------------|--------------------------------|-----------------------------------------------------------------|--------------------|
|                                                                                                                                                                                                                | NCT00010803      | III    | AD onset in normal-MCI pts                 | 3,069 pts, 75+ y, 8 y, 2 arms                                       | MMSE, CDR-SB, ADAS-Cog    | none reported                             | <i>APOE</i>                    | no significant efficacy [41]                                    | NCCIH              |
|                                                                                                                                                                                                                | NCT00276510      | III/IV | AD onset in pts with memory complaints     | 2,878 pts, 70+ y, 5 y, 2 arms                                       | MMSE, CDR-SB              | none reported                             | none reported                  | no significant efficacy [42]                                    | Ipsen              |
| <b>2011. Rosiglitazone. Energy utilization</b> - marketed diabetes medication and insulin sensitizer, binds PPAR $\gamma$ , possible anti-inflammatory effects                                                 |                  |        |                                            |                                                                     |                           |                                           |                                |                                                                 |                    |
|                                                                                                                                                                                                                | NCT00428090      | III    | mild-moderate, based on <i>APOE</i> status | 693 pts, 50-90 y, 24 wk, 8 arms                                     | ADAS-Cog, CIBIC+          | <i>APOE</i>                               | none reported                  | no significant efficacy, discontinued [43]                      | GSK                |
|                                                                                                                                                                                                                | NCT00348309      | III    | mild-moderate, based on <i>APOE</i> status | 1,496 pts, 50-90 y, 54 wk 6 arms                                    | ADAS-Cog, CDR-SB          | CT or MRI, <i>APOE</i>                    | none reported                  | no significant efficacy, discontinued [44]                      | GSK                |
|                                                                                                                                                                                                                | NCT00348140      | III    | mild-moderate, based on <i>APOE</i> status | 1,468 pts, 50-90 y, 54 wk, 6 arms                                   | ADAS-Cog, CDR-SB          | CT or MRI, <i>APOE</i>                    | none reported                  | no significant efficacy, discontinued [44]                      | GSK                |
| <b>2011. Simvastatin. Cholesterol</b> - marketed lipid-lowering drug for hypercholesterolemia                                                                                                                  |                  |        |                                            |                                                                     |                           |                                           |                                |                                                                 |                    |
|                                                                                                                                                                                                                | NCT00053599      | III    | mild-moderate                              | 406 pts, 50+ y, 18 mo, 2 arms                                       | ADAS-Cog                  | none reported                             | none reported                  | no significant efficacy [45]                                    |                    |
| <b>2011. Estrogen (with/without Progesterone). Hormone treatment</b> - female sex hormone replacement                                                                                                          |                  |        |                                            |                                                                     |                           |                                           |                                |                                                                 |                    |
|                                                                                                                                                                                                                | NCT00066157      | II/III | mild-moderate                              | 43 female pts, 55-90 y, 15 mo, 4 arms, with/without progesterone    | SRT, Stroop, CIBIC        | none reported                             | none reported                  | weak efficacy reported, but no follow-up [46, 47]               | Univ. of Wisconsin |
|                                                                                                                                                                                                                | NCT00000176      | III    | AD                                         | pt number not stated, 3 y, 65+ y, 3 arms, with/without progesterone | not stated                | none reported                             | none reported                  | no follow-up report [47]                                        | NIA                |
| <b>2010. Latrepirdine (Dimebolin, Pf-01913539). Symptomatic</b> - marketed antihistamine to treat allergic rhinitis, may work via histamine H1 receptor blockage, other neurotransmitters, or calcium channels |                  |        |                                            |                                                                     |                           |                                           |                                |                                                                 |                    |
|                                                                                                                                                                                                                | NCT00675623      | III    | mild-moderate                              | 598 pts, 50+ y, 6 mo, 3 arms                                        | ADAS-Cog, CIBIC+          | MRI or CT                                 | none reported                  | no significant efficacy, discontinued [48, 49]                  | Medivation         |
|                                                                                                                                                                                                                | NCT00829374      | III    | mild-moderate                              | 1,003 pts, 50+ y, 12 mo, 3 arms                                     | ADCS-ADL, ADAS-Cog        | MRI or CT                                 | none reported                  | no significant efficacy, discontinued [49]                      | Medivation         |
|                                                                                                                                                                                                                | NCT00912288      | III    | moderate-severe                            | 86 pts, 50+ y, 26 wk, 2 arms                                        | SIB, ADCS-ADL             | none reported                             | none reported                  | trial terminated due to earlier Ph 3 failure, discontinued [49] | Pfizer             |
|                                                                                                                                                                                                                | NCT00954590      | III    | moderate-severe                            | 89 pts, 50+ y, 26 wk, 2 arms                                        | ADCS-ADL, NPI             | none reported                             | none reported                  | trial terminated due to earlier Ph 3 failure, discontinued [49] | Medivation         |

| Failure Year                                                                                                                                                                                      | Clinical Trial # | Ph     | Target AD Patients                        | Clinical Trial Design                          | Primary Clinical Endpoint                        | Biomarker: Inclusion / Exclusion Criteria | Biomarker: Efficacy Evaluation | Results and Notes                                                    | Main Sponsor                                           |
|---------------------------------------------------------------------------------------------------------------------------------------------------------------------------------------------------|------------------|--------|-------------------------------------------|------------------------------------------------|--------------------------------------------------|-------------------------------------------|--------------------------------|----------------------------------------------------------------------|--------------------------------------------------------|
| <b>2009. Xaliproden (SR 57746A). Symptomatic - 5-HT 1A receptor antagonist</b>                                                                                                                    |                  |        |                                           |                                                |                                                  |                                           |                                |                                                                      |                                                        |
|                                                                                                                                                                                                   | NCT00104013      | III    | mild-moderate                             | 1,455 pts, 50+ y, 18 mo, 3 arms                | ADAS-Cog, CDR-SB                                 | none reported                             | none reported                  | potential worsening of cognition and function, discontinued [50, 51] | Sanofi                                                 |
|                                                                                                                                                                                                   | NCT00103649      | III    | mild-moderate                             | 1,306 pts, 50+ y, 18 mo, 3 arms                | ADAS-Cog, CDR-SB                                 | none reported                             | none reported                  | potential worsening of cognition and function, discontinued [50, 51] | Sanofi                                                 |
| <b>2009. Lecozotan (SRA-333). Symptomatic - 5-HT 1A receptor selective antagonist</b>                                                                                                             |                  |        |                                           |                                                |                                                  |                                           |                                |                                                                      |                                                        |
| Date is estimate                                                                                                                                                                                  | NCT00277810      | II/III | mild-moderate                             | 250 pts, 50+ y, 6 mo, 3 arms                   | cognitive & functional scales (no other details) | none reported                             | <i>APOE</i>                    | discontinued [53]                                                    | Pfizer                                                 |
| <b>2009. Atomoxetine (ATX). Symptomatic - marketed for ADHD, selective NE reuptake inhibitor</b>                                                                                                  |                  |        |                                           |                                                |                                                  |                                           |                                |                                                                      |                                                        |
|                                                                                                                                                                                                   | NCT00191009      | II/III | mild-moderate                             | 92 pts, 55+ y, 6 mo, 2 arms                    | ADAS-Cog                                         | none reported                             | none reported                  | no significant efficacy, discontinued [54, 55]                       | Eli Lilly                                              |
| <b>2009. Tarenflurbil (MPC-7869, r-flurbiprofen). A<math>\beta</math> production - R-enantiomer of marketed NSAID flurbiprofen, modulation of APP / <math>\gamma</math>-secretase interaction</b> |                  |        |                                           |                                                |                                                  |                                           |                                |                                                                      |                                                        |
|                                                                                                                                                                                                   | NCT00105547      | III    | mild                                      | 1,684 pts, 55+ y, 18 mo, 2 arms                | ADAS-Cog, ADCS-ADL                               | none reported                             | none reported                  | no significant efficacy, discontinued [56, 57]                       | Myrexis                                                |
|                                                                                                                                                                                                   | NCT00322036      | III    | mild                                      | 800 pts, 55+ y, 18 mo, 2 arms                  | did not specify                                  | none reported                             | none reported                  | trial terminated due to other Ph 3 failure [57]                      | Myrexis                                                |
| <b>2008. Atorvastatin. Cholesterol - marketed statin for hypercholesterolemia.</b>                                                                                                                |                  |        |                                           |                                                |                                                  |                                           |                                |                                                                      |                                                        |
|                                                                                                                                                                                                   | NCT00151502      | III    | mild-moderate                             | 640 pts, 50-90 y, 80 wk, 2 arms                | ADAS-Cog, ADCS-CGIC                              | none reported                             | none reported                  | no significant efficacy [58]                                         | Pfizer                                                 |
| <b>2008. Indomethacin. Inflammation - marketed NSAID, reduces prostaglandin synthesis</b>                                                                                                         |                  |        |                                           |                                                |                                                  |                                           |                                |                                                                      |                                                        |
|                                                                                                                                                                                                   | NCT00432081      | III    | mild-moderate                             | 51 pts (aimed for 160), 40-90 y, 12 mo, 2 arms | ADAS-Cog                                         | none reported                             | none reported                  | no significant efficacy [59]                                         | Radboud Univ.                                          |
| <b>2007. Naproxen, Celecoxib (separate arms). Inflammation - marketed NSAID, COX inhibitors, reduces prostaglandin synthesis</b>                                                                  |                  |        |                                           |                                                |                                                  |                                           |                                |                                                                      |                                                        |
|                                                                                                                                                                                                   | NCT00007189      | III    | AD onset in pts with family history of AD | 2,528 pts, 70+ y, ~1.5+7 y follow-up, 3 arms   | composite of cognitive function tests **         | none reported                             | none reported                  | no significant efficacy, discontinued [60-62]                        | Seattle Institute for Biomedical and Clinical Research |
| <b>2007. Tramiprosate (3APS, Alzhemed™, NC-531, homotaurine). A<math>\beta</math> plaque formation - variant of amino acid taurine, binds to A<math>\beta</math></b>                              |                  |        |                                           |                                                |                                                  |                                           |                                |                                                                      |                                                        |
|                                                                                                                                                                                                   | NCT00088673      | III    | mild-moderate                             | 1,052 pts, 50+ y, 18 mo, 2 arms                | ADAS-Cog, CDR-SB                                 | none reported                             | MRI                            | no significant efficacy, discontinued [63, 64]                       | Bellus                                                 |
|                                                                                                                                                                                                   | NCT00217763      | III    | mild-moderate                             | 930 pts, 50+ y, 18 mo, 3 arms                  | not stated                                       | none reported                             | none reported                  | discontinued [64]                                                    | Bellus                                                 |
| <b>2006. Raloxifene. Hormone treatment - selective estrogen receptor modulator</b>                                                                                                                |                  |        |                                           |                                                |                                                  |                                           |                                |                                                                      |                                                        |
| Date is estimate                                                                                                                                                                                  | NCT00065767      | II/III | mild-moderate                             | 20 female pts, 55-90 y, 5 mo, 2 arms           | not stated                                       | none reported                             | none reported                  | no follow-up report, although another                                | Univ. of Wisconsin                                     |

| Failure Year                                                                                      | Clinical Trial # | Ph  | Target AD Patients | Clinical Trial Design         | Primary Clinical Endpoint | Biomarker: Inclusion / Exclusion Criteria | Biomarker: Efficacy Evaluation | Results and Notes                          | Main Sponsor |
|---------------------------------------------------------------------------------------------------|------------------|-----|--------------------|-------------------------------|---------------------------|-------------------------------------------|--------------------------------|--------------------------------------------|--------------|
|                                                                                                   |                  |     |                    |                               |                           |                                           |                                | clinical trial reported no efficacy [65]   |              |
| <b>2004. Neramexane (MRZ 2/579). Symptomatic - NMDA receptor antagonist, similar to memantine</b> |                  |     |                    |                               |                           |                                           |                                |                                            |              |
|                                                                                                   | NCT00090116      | III | moderate-severe    | 415 pts, 50+ y, 24 wk, 2 arms | SIB, ADCS-ADL             | none reported                             | none reported                  | little details reported, discontinued [66] | Forest       |

Reported year of compound failure is a “best estimate” based on the publicly available information, as at times sponsors delay reporting the trial failure or do not report it at all; the most recent failure year is reported. Compound name includes alternate names, if any, in brackets. MOA (mechanism of action) class and description are based on weight of the evidence, as in some cases the MOA is not well understood or multiple potential mechanisms were listed. For any discrepancies in clinical trial design details between Clinical-Trials.gov and published paper, the latter is cited. Biomarkers: A $\beta$  includes its variants (e.g., A $\beta$ <sub>40</sub>, A $\beta$ <sub>42</sub>, ratios); tau can be total tau or P-tau; MRI can be for whole brain or specific regions (e.g., hippocampus, ventricles, cortical regions). ^^ Consists of 4 cognitive measures: Wechsler Memory Scale-Revised Logical Memory Delayed Recall Test, Wechsler Adult Intelligence Scale Digit Symbol Substitution Test (WAIS), International Shopping List Task (ISLT), Mini-Mental State Examination (MMSE). \* Preclinical Alzheimer cognitive composite, comprised of 4 components: Selective Reminding, Delayed Paragraph Recall, WAIS and MMSE. ^ Measured by composite of several test batteries as well as ADCS-ADL. \*\* Composite of seven cognitive assessment tests.

5-HT, Serotonin; A $\beta$ , amyloid- $\beta$ , ACh, acetylcholine; ADAS-Cog, Alzheimer’s Disease Assessment Scale - cognitive subscale; ADCS-ADL, Alzheimer's Disease Cooperative Study - Activities of Daily Living inventory scale; ADHD, attention deficit hyperactivity disorder; APP, amyloid precursor protein; APCC, Alzheimer's Prevention Initiative Composite Cognitive test; *APOE*, Apolipoprotein E; BACE,  $\beta$ -secretase; CDR-SB, Clinical Dementia Rating Scale - sum of boxes; CIBIC+, Clinician’s Interview-Based Impression Change – plus; COX, cyclooxygenase; CSF, cerebrospinal fluid; CT, computerized axial tomography; DAD, Disability Assessment for Dementia; MCI, mild cognitive impairment; MMSE, Mini-Mental State Examination; mo, months; MRI, magnetic resonance imaging; NCCIH, National Center for Complementary and Integrative Health; NE, norepinephrine; NfL, neurofilament light chain; NIA, National Institute on Aging; NMDA, N-methyl-D-aspartate; NPI, Neuropsychiatric Inventory; NSAID, non-steroidal anti-inflammatory drug; PACC, Preclinical Alzheimer Cognitive Composite; PET, positron emission tomography; Ph, phase; PPAR, peroxisome-proliferator activated receptor; pts, patients; RAGE, receptor for advanced glycation endproducts; rCBF, regional cerebral blood flow; SIB, Severe Impairment Battery; SRT, Buschke Selective Reminding Test; Stroop, Stroop interference condition; TNF, tumor necrosis factor; WAIS, Wechsler Adult Intelligence Scale; wk, weeks; y, years

**Supplementary Table 2.** Details of the 58 unique phase 2 compound failures from 2004 to the present.

| Failure Year | Compound                                 | MOA Class                     | MOA Description                                                                                                                | Clinical Trial #           | Ph | Results and Notes                                                                         | Main Sponsor                                   |
|--------------|------------------------------------------|-------------------------------|--------------------------------------------------------------------------------------------------------------------------------|----------------------------|----|-------------------------------------------------------------------------------------------|------------------------------------------------|
| 2021         | Gosuranemab (BIIB092)                    | Tau                           | antibody against extracellular N-terminal fragments of tau                                                                     | NCT03352557                | II | discontinued [67]                                                                         | Biogen                                         |
| 2021         | Tilavonemab (ABBV-8E12, C2N 8E12, HJ9.3) | Tau                           | recognizes aggregated, extracellular form of pathological tau                                                                  | NCT02880956                | II | discontinued [68]                                                                         | AbbVie                                         |
| 2021         | Zagotenemab (LY3303560)                  | Tau                           | selectively binds to aggregates over monomer tau at its N-terminal region                                                      | NCT03518073                | II | discontinued [69]                                                                         | Eli Lilly                                      |
| 2019         | DCB-AD1                                  | Other                         | undefined MOA, potential scavenging activities, anti-inflammatory or anti-peroxidation actions                                 | NCT00154635                | II | discontinued [70]                                                                         | National Taiwan Univ. Hospital                 |
| 2019         | Rilapladib (SB-659032)                   | Inflammation                  | lipoprotein associated phospholipase A2 selective inhibitor, acting via anti-inflammation actions                              | NCT01428453                | II | discontinued [71]                                                                         | GSK                                            |
| 2018         | Saracatinib (AZD0530)                    | Neuroprotectant / Antioxidant | inhibits Fyn and Src family kinases with resultant impacts on synaptotoxicity; may impact A $\beta$ and tau                    | NCT02167256                | II | discontinued [72]                                                                         | Yale Univ.                                     |
| 2018         | LY3202626                                | A $\beta$ production          | BACE Inhibitor                                                                                                                 | NCT02791191                | II | trial terminated based on futility analysis, discontinued [73]                            | Eli Lilly                                      |
| 2018         | BI 409306 (SUB 166499)                   | Symptomatic                   | PDE 9A inhibitor which increases cGMP levels to modulate glutamate, and impact synaptic transmission and plasticity            | NCT02240693<br>NCT02337907 | II | no significant efficacy, discontinued [74, 75]                                            | Boehringer Ingelheim                           |
| 2018         | ORM-12741 (DB 105)                       | Symptomatic                   | $\alpha$ 2c adrenergic receptor antagonist                                                                                     | NCT01324518                | II | discontinued [76]                                                                         | Orion                                          |
| 2017         | S47445 (CX1632)                          | Symptomatic                   | AMPA glutamate receptor agonist                                                                                                | NCT02626572                | II | no significant efficacy, discontinued [77, 78]                                            | Institut de Recherches Internationales Servier |
| 2016         | Exenatide                                | Energy utilization            | glucagon-like peptide-1 receptor agonist approved for diabetes                                                                 | NCT01255163                | II | no efficacy, trial terminated; AstraZeneca withdrew support [79]                          | NIA                                            |
| 2016         | Ladostigil (TV3326)                      | Symptomatic                   | rivastigmine and rasagiline combination; inhibitor of AChE, butyrylcholinesterase and MAOs; potential neuroprotective activity | NCT01429623<br>NCT01354691 | II | no significant efficacy, discontinued [80, 81]                                            | Avraham                                        |
| 2016         | MK-7622                                  | Symptomatic                   | muscarinic ACh positive allosteric modulator                                                                                   | NCT01852110                | II | trial terminated based on futility analysis, discontinued [82]                            | Merck Sharp & Dohme                            |
| 2016         | Bexarotene                               | A $\beta$ plaque formation    | retinoid x receptor agonist, removes soluble A $\beta$                                                                         | NCT01782742                | II | primary outcome was negative [83]                                                         | Cleveland Clinic                               |
| 2016         | PF-05212377 (SAM-760)                    | Symptomatic                   | 5-HT 6 receptor antagonist                                                                                                     | NCT01712074                | II | trial terminated due to futility analysis, no significant efficacy, discontinued [84, 85] | Pfizer                                         |



| Failure Year | Compound                                  | MOA Class                    | MOA Description                                                                                                     | Clinical Trial #                                                                       | Ph         | Results and Notes                                              | Main Sponsor           |
|--------------|-------------------------------------------|------------------------------|---------------------------------------------------------------------------------------------------------------------|----------------------------------------------------------------------------------------|------------|----------------------------------------------------------------|------------------------|
| 2015         | VI-1121                                   | Tau                          | no additional information is available                                                                              | NCT01428362                                                                            | II         | discontinued [86]                                              | VIVUS                  |
| 2015         | CERE-110                                  | Neural growth / Regeneration | nerve growth factor gene therapy                                                                                    | NCT00876863                                                                            | II         | discontinued [87]                                              | Sangamo                |
| 2015         | Sembragiline (RO4602522, RG1577)          | Symptomatic                  | MAO-B inhibitor                                                                                                     | NCT01677754                                                                            | II         | discontinued [88, 89]                                          | Roche                  |
| 2015         | ST101 (ZSET1446)                          | Symptomatic                  | ACh stimulant, may A $\beta$ generation by modulating APP cleavage                                                  | NCT00842816<br>NCT00842673                                                             | II         | discontinued [90]                                              | Sonexa                 |
| 2015         | GSK239512                                 | Symptomatic                  | histamine H3 receptor antagonist                                                                                    | NCT01009255                                                                            | II         | no significant efficacy, discontinued [91, 92]                 | GSK                    |
| 2014         | Affitope AD02                             | A $\beta$ vaccine            | active immunotherapy, peptide mimics N-terminus of A $\beta$                                                        | NCT01117818<br>NCT02008513                                                             | II         | no significant efficacy, discontinued [93, 94]                 | Affiris                |
| 2014         | AZD3480 (Ispronicline, TC-1734)           | Symptomatic                  | nicotinic ACh receptor selective agonist                                                                            | NCT00501111<br>NCT01466088<br>NCT00109564                                              | II         | did not meet POC, discontinued [95, 96]                        | AstraZeneca, Targacept |
| 2014         | NIC5-15 (Pinitol)                         | Energy utilization           | cyclic sugar alcohol, insulin sensitizer, may modulate $\gamma$ -secretase                                          | NCT00470418<br>NCT01928420                                                             | II         | no longer in company pipeline [97]                             | Humanetics             |
| 2014         | ABT-126 (Nelonicline)                     | Symptomatic                  | nicotinic ACh receptor allosteric modulator                                                                         | NCT01527916<br>NCT01549834<br>NCT00948909                                              | II         | no significant efficacy, discontinued [98-100]                 | AbbVie                 |
| 2014         | ABT-288                                   | Symptomatic                  | histamine H3 receptor antagonist                                                                                    | NCT01018875                                                                            | II         | terminated based on futility analysis, discontinued [101, 102] | AbbVie                 |
| 2014         | ABT-384                                   | Inflammation                 | HSD type 1 selective inhibitor                                                                                      | NCT01137526                                                                            | II         | terminated based on futility analysis, discontinued [103, 104] | AbbVie                 |
| 2014         | PF-04447943                               | Symptomatic                  | PDE 9A inhibitor which increases cGMP levels to modulate glutamate, and impact synaptic transmission and plasticity | NCT00930059                                                                            | II         | no significant efficacy, discontinued [105, 106]               | Pfizer                 |
| 2013         | Vanutide cridifcar (ACC-001, PF-05236806) | A $\beta$ vaccine            | active immunotherapy, conjugate of multiple short A $\beta$ fragments                                               | NCT00959192<br>NCT00752232<br>NCT01227564<br>NCT01284387<br>NCT00479557<br>NCT00498602 | II         | no significant efficacy, discontinued [107, 108]               | Pfizer, Janssen        |
| 2013         | LY2886721                                 | A $\beta$ production         | BACE inhibitor                                                                                                      | NCT01561430                                                                            | I/II       | trial terminated based on adverse events, discontinued [109]   | Eli Lilly              |
| 2013         | SAR 110894                                | Symptomatic                  | histamine H3 receptor antagonist                                                                                    | NCT01266525                                                                            | II         | discontinued [110]                                             | Sanofi                 |
| 2012         | Avagacestat (BMS-708163)                  | A $\beta$ production         | $\gamma$ -secretase inhibitor                                                                                       | NCT00810147<br>NCT00890890                                                             | II         | no significant efficacy, discontinued [111-113]                | BMS                    |
| 2012         | Tideglusib (NP031112, NP12)               | Tau                          | inhibitor of tau hyperphosphorylation via glycogen synthase kinase 3                                                | NCT01350362<br>NCT00948259                                                             | I/II or II | no significant efficacy, discontinued [114, 115]               | Noscira                |

| Failure Year | Compound                     | MOA Class                  | MOA Description                                                             | Clinical Trial #           | Ph   | Results and Notes                                                                               | Main Sponsor        |
|--------------|------------------------------|----------------------------|-----------------------------------------------------------------------------|----------------------------|------|-------------------------------------------------------------------------------------------------|---------------------|
| 2012         | MK 0249                      | Symptomatic                | histamine H3 receptor inverse agonist                                       | NCT00420420                | II   | no significant efficacy, discontinued [116, 117]                                                | Merck Sharp & Dohme |
| 2012         | Lornoxicam                   | Inflammation               | NSAID                                                                       | NCT01117948                | II   | trial terminated due to lack of efficacy, discontinued [118]                                    | JSW                 |
| 2012         | Ponezumab (PF-04360365)      | A $\beta$ plaque formation | elevates plasma A $\beta$ <sub>40</sub> levels                              | NCT00945672<br>NCT00722046 | II   | discontinued [119]                                                                              | Pfizer              |
| 2011         | AZD1446 (TC-6683)            | Symptomatic                | nicotinic ACh receptor agonist                                              | NCT01039701                | II   | discontinued [120]                                                                              | AstraZeneca         |
| 2011         | Cerlapirdine (SAM-531)       | Symptomatic                | 5-HT 6 receptor antagonist                                                  | NCT00895895                | II   | trial terminated, discontinued [121]                                                            | Pfizer              |
| 2011         | Varenicline (CP-526,555)     | Symptomatic                | nicotinic ACh receptor partial agonist                                      | NCT00744978                | II   | no significant efficacy, discontinued [122, 123]                                                | Pfizer              |
| 2011         | ELND005 (AZD-103)            | A $\beta$ plaque formation | neutralize low-N A $\beta$ oligomers and prevent their aggregation          | NCT00568776                | II   | no sign of efficacy [124]                                                                       | OPKO                |
| 2010         | RG3487 (RO5313534, MEM 3454) | Symptomatic                | nicotinic ACh receptor partial agonist                                      | NCT00884507<br>NCT00454870 | II   | discontinued [125]                                                                              | Roche, Memory       |
| 2009         | Pozanicline (ABT-089)        | Symptomatic                | nicotinic ACh receptor partial agonist                                      | NCT00555204<br>NCT00069849 | II   | trials terminated based on futility analysis, discontinued [126, 127]                           | Abbott              |
| 2009         | Etazolate (EHT0202)          | A $\beta$ production       | APP secretase inhibitor, also GABA-A receptor modulator and PDE-4 inhibitor | NCT00880412                | II   | discontinued [128]                                                                              | Exonhit             |
| 2009         | Radequinil (AC-3933)         | Symptomatic                | GABA-A receptor partial inverse agonist                                     | NCT00359944                | II   | discontinued [129]                                                                              | Sunovion            |
| 2009         | MK-677                       | Hormone treatment          | growth hormone secretagogue, potent inducer of IGF-1 secretion              | NCT00074529                | II   | no significant efficacy [130]                                                                   | Merck Sharp & Dohme |
| 2008         | HF0220                       | Inflammation               | steroid, potential neuroprotective agent                                    | NCT00357357                | II   | discontinued [131]                                                                              | Hunter-Fleming      |
| 2008         | SSR180711C                   | Symptomatic                | nicotinic ACh receptor agonist                                              | NCT00602680                | II   | trial terminated due to insufficient expected benefit risk, no longer in company pipeline [132] | Sanofi              |
| 2008         | MK0952                       | Symptomatic                | PDE 4 inhibitor which impacts cAMP levels                                   | NCT00362024                | II   | trial terminated, discontinued [133]                                                            | Merck Sharp & Dohme |
| 2008         | AVE1625 (Drinabant)          | Other                      | cannabinoid receptor 1 antagonist, may impact tau phosphorylation           | NCT00380302                | I/II | discontinued [134]                                                                              | Sanofi              |
| 2008         | GTS-21 (DMXB-A)              | Symptomatic                | nicotinic ACh receptor agonist                                              | NCT00414622                | II   | discontinued [135]                                                                              | CoMentis            |
| 2008         | MEM 1003 (BAY Z 4406)        | Vascular burden            | L-type Ca <sup>2+</sup> channel antagonist                                  | NCT00257673                | II   | discontinued [136]                                                                              | Memory              |
| 2008         | SGS 742 (CGP-36742, DVD-742) | Symptomatic                | GABA-B receptor antagonist                                                  | NCT00093951                | II   | discontinued [137]                                                                              | Saegis              |

| Failure Year | Compound                     | MOA Class                            | MOA Description                                                             | Clinical Trial #           | Ph | Results and Notes                         | Main Sponsor            |
|--------------|------------------------------|--------------------------------------|-----------------------------------------------------------------------------|----------------------------|----|-------------------------------------------|-------------------------|
| 2008         | TRx 0014<br>(Rember TM)      | <b>Tau</b>                           | prevents tau aggregation or dissolve existing aggregates                    | NCT00515333                | II | discontinued [138]                        | TauRx                   |
| 2008         | ONO-2506PO<br>(Arundic acid) | <b>Neuroprotectant / Antioxidant</b> | astrocyte modulators, cyclo-oxygenase 2 inhibitors, free radical scavenger  | NCT00083421                | II | discontinued [139]                        | Ono                     |
| 2007         | SR57667B<br>(Paliroden)      | <b>Neural growth / Regeneration</b>  | neurotrophic, activates synthesis of endogenous neurotrophins               | NCT00285025                | II | discontinued [140]                        | Sanofi                  |
| 2006         | FK962                        | <b>Hormone treatment</b>             | enhancer of somatostatin release                                            | NCT00087724                | II | trial terminated, discontinued [141]      | Astellas                |
| 2006         | CX516<br>(Ampalex)           | <b>Symptomatic</b>                   | AMPA glutamate receptor mediator                                            | NCT00040443<br>NCT00001662 | II | discontinued [142]                        | RespireRx,<br>NINDS     |
| 2006         | NS 2330<br>(Tesofensine)     | <b>Symptomatic</b>                   | MAO inhibitor which inhibits dopamine, serotonin and noradrenaline reuptake | NCT00153010                | II | discontinued [143]                        | Boehringer<br>Ingelheim |
| 2005         | Mifepristone                 | <b>Inflammation</b>                  | glucocorticoid antagonist                                                   | NCT00105105                | II | trial terminated, discontinued [144, 145] | Corcept                 |

Reported year of compound failure is a “best estimate” based on the publicly available information, as at times sponsors delay reporting the trial failure or do not report it at all; the most recent failure year is reported. Compound name includes alternate names, if any, in brackets. MOA (mechanism of action) class and description are based on weight of the evidence, as in some cases the MOA is not well understood or multiple potential mechanisms were listed.

5-HT, Serotonin; A $\beta$ , amyloid- $\beta$ ; ACh, acetylcholine; AChE, acetylcholinesterase; AMPA,  $\alpha$ -amino-3-hydroxy-5-methyl-4-isoxazolepropionic acid receptor; APP, amyloid precursor protein; BACE,  $\beta$ -secretase; cAMP, cyclic adenosine monophosphate; HSD, 11- $\beta$ -hydroxysteroid dehydrogenase; IGF, insulin-like growth factor; MAO, monoamine oxidase; NSAID, non-steroidal anti-inflammatory drug; NINDS, National Institute of Neurological Disorders and Stroke; PDE, phosphodiesterase.

## REFERENCES

- [1] Eli Lilly (2020) *Lilly Announces Topline Results for Solanezumab from the Dominantly Inherited Alzheimer Network Trials Unit (DIAN-TU) Study*.  
<https://investor.lilly.com/news-releases/news-release-details/lilly-announces-topline-results-solanezumab-dominantly-inherited>, Accessed December, 2021.
- [2] Doody RS, Thomas RG, Farlow M, Iwatsubo T, Vellas B, Joffe S, Kieburtz K, Raman R, Sun X, Aisen PS, Siemers E, Liu-Seifert H, Mohs R, Alzheimer's Disease Cooperative Study Steering Committee; Solanezumab Study Group (2014) Phase 3 trials of solanezumab for mild-to-moderate Alzheimer's disease. *N Engl J Med* **370**, 311–321.
- [3] Siemers ER, Sundell KL, Carlson C, Case M, Sethuraman G, Liu-Seifert H, Dowsett SA, Pontecorvo MJ, Dean RA, Demattos R (2016) Phase 3 solanezumab trials: Secondary outcomes in mild Alzheimer's disease patients. *Alzheimers Dement* **12**, 110–120.
- [4] Honig LS, Vellas B, Woodward M, Boada M, Bullock R, Borrie M, Hager K, Andreasen N, Scarpini E, Liu-Seifert H, Case M, Dean RA, Hake A, Sundell K, Poole Hoffmann V, Carlson C, Khanna R, Mintun M, DeMattos R, Selzler KJ, Siemers E (2018) Trial of solanezumab for mild dementia due to Alzheimer's disease. *N Engl J Med* **378**, 321–330.
- [5] Roche (2020) *Roche provides topline results from investigator-led Phase II/III trial with gantenerumab in rare inherited form of Alzheimer's disease*.  
<https://www.roche.com/de/media/releases/med-cor-2020-02-10>, Accessed December, 2021.
- [6] Ostrowitzki S, Lasser RA, Dorflinger E, Scheltens P, Barkhof F, Nikolcheva T, Ashford E, Retout S, Hofmann C, Delmar P, Klein G, Andjelkovic M, Dubois B, Boada M, Blennow K, Santarelli L, Fontoura P, SCarlet RoAD Investigators (2017) A phase III randomized trial of gantenerumab in prodromal Alzheimer's disease. *Alzheimers Res Ther* **9**, 95.
- [7] Biogen (2019) *Eisai and Biogen to Discontinue Phase III Clinical Studies of BACE Inhibitor Elenbecestat in Early Alzheimer's Disease*. <https://investors.biogen.com/news-releases/news-release-details/eisai-and-biogen-discontinue-phase-iii-clinical-studies-bace>, Accessed December, 2021.
- [8] Alzheimer Research Forum, Elenbecestat,  
<https://www.alzforum.org/therapeutics/elenbecestat>, Accessed December, 2021.

- [9] Roche (2019) *Roche to discontinue Phase III CREAD 1 and 2 clinical studies of crenezumab in early Alzheimer's disease (AD) - other company programmes in AD continue*. <https://www.roche.com/media/releases/med-cor-2019-01-30>, Accessed December, 2021.
- [10] Novartis (2019) *Novartis Q3 and 9M 2019 Condensed Condensed Interim Financial Report – Supplementary Data*. [https://www.novartis.com/sites/novartis\\_com/files/2019-10-interim-financial-report-en.pdf](https://www.novartis.com/sites/novartis_com/files/2019-10-interim-financial-report-en.pdf), Accessed December, 2021.
- [11] Novartis (2019) *Novartis, Amgen and Banner Alzheimer's Institute discontinue clinical program with BACE inhibitor CNP520 for Alzheimer's prevention*. <https://www.novartis.com/news/media-releases/novartis-amgen-and-banner-alzheimers-institute-discontinue-clinical-program-bace-inhibitor-cnp520-alzheimers-prevention>, Accessed December, 2021.
- [12] VTv Therapeutics (2018) *vTv Therapeutics Announces Topline Results from the First STEADFAST Phase 3 Study Evaluating Azeliragon in People with Mild Alzheimer's Disease*. <https://ir.vtvtherapeutics.com/news-releases/news-release-details/vtv-therapeutics-announces-topline-results-first-steadfast-phase>, Accessed December, 2021.
- [13] Janssen (2018) *Update on Janssen's BACE Inhibitor Program*. <https://www.janssen.com/neuroscience/update-janssens-bace-inhibitor-program>, Accessed December, 2021.
- [14] Wessels AM, Tariot PN, Zimmer JA, Selzler KJ, Bragg SM, Andersen SW, Landry J, Krull JH, Downing AM, Willis BA, Shcherbinin S, Mullen J, Barker P, Schumi J, Shering C, Matthews BR, Stern RA, Vellas B, Cohen S, MacSweeney E, Boada M, Sims JR (2019) Efficacy and safety of lanabecestat for treatment of early and mild Alzheimer disease: The AMARANTH and DAYBREAK-ALZ randomized clinical trials. *JAMA Neurol* **77**, 199–209.
- [15] Alzheimer Research Forum, Lanabecestat, <https://www.alzforum.org/therapeutics/azd3293>, Accessed December, 2021.
- [16] Egan MF, Kost J, Tariot PN, Aisen PS, Cummings JL, Vellas B, Sur C, Mukai Y, Voss T, Furtek C, Mahoney E, Harper Mozley L, Vandenberghe R, Mo Y, Michelson D (2018) Randomized trial of verubecestat for mild-to-moderate Alzheimer's disease. *N Engl J Med* **378**, 1691–1703.

- [17] Egan MF, Mukai Y, Voss T, Kost J, Stone J, Furtek C, Mahoney E, Cummings JL, Tariot PN, Aisen PS, Vellas B, Lines C, Michelson D (2019) Further analyses of the safety of verubecestat in the phase 3 EPOCH trial of mild-to-moderate Alzheimer's disease. *Alzheimers Res Ther* **11**, 68.
- [18] Alzheimer Research Forum, Verubecestat, <https://www.alzforum.org/therapeutics/verubecestat>, Accessed December, 2021..
- [19] Egan MF, Kost J, Voss T, Mukai Y, Aisen PS, Cummings JL, Tariot PN, Vellas B, van Dyck CH, Boada M, Zhang Y, Li W, Furtek C, Mahoney E, Harper Mozley L, Mo Y, Sur C, Michelson D (2019) Randomized trial of verubecestat for prodromal Alzheimer's disease. *N Engl J Med* **380**, 1408–1420.
- [20] Takeda (2018) *Takeda and Zinfandel Pharmaceuticals Discontinue TOMMORROW Trial Following Planned Futility Analysis*. <https://www.takeda.com/newsroom/newsreleases/2018/takeda-tommorrow-trial/>, Accessed December, 2021.
- [21] Lawlor B, Segurado R, Kennelly S, Olde Rikkert MGM, Howard R, Pasquier F, Börjesson-Hanson A, Tsolaki M, Lucca U, Molloy DW, Coen R, Riepe MW, Kálmán J, Kenny RA, Cregg F, O'Dwyer S, Walsh C, Adams J, Banzi R, Breuilh L, Daly L, Hendrix S, Aisen P, Gaynor S, Sheikhi A, Taekema DG, Verhey FR, Nemni R, Nobili F, Franceschi M, Frisoni G, Zanetti O, Konsta A, Anastasios O, Nenopoulou S, Tsolaki-Tagaraki F, Pakaski M, Dereeper O, de la Sayette V, Sénéchal O, Lavenu I, Devendeville A, Calais G, Crawford F, Mullan M, NILVAD Study Group (2018) Nilvadipine in mild to moderate Alzheimer disease: A randomised controlled trial. *PLoS Med* **15**, e1002660.
- [22] Cerecin (2017) *Accera Announces Results of its First Phase 3 Study in Mild-to-Moderate Alzheimer's Disease*. <https://www.cerecin.com/newsroom/accera-announces-results-of-its-first-phase-3-study.html>, Accessed December, 2021.
- [23] Atri A, Frölich L, Ballard C, Tariot PN, Molinuevo JL, Boneva N, Windfeld K, Raket LL, Cummings JL (2018) Effect of idalopirdine as adjunct to cholinesterase inhibitors on change in cognition in patients with Alzheimer disease: three randomized clinical trials. *JAMA* **319**, 130–142.
- [24] Alzheimer Research Forum, Idalopirdine, <https://www.alzforum.org/therapeutics/idalopirdine>, Accessed December, 2021.

- [25] Axovant (2017) *Axovant Announces Negative Topline Results of Intepirdine Phase 3 Mindset Trial in Alzheimer's Disease*. <http://investors.axovant.com/news-releases/news-release-details/axovant-announces-negative-topline-results-intepirdine-phase-3>, Accessed December, 2021.
- [26] Alzheimer Research Forum, Intepirdine, <https://www.alzforum.org/therapeutics/intepirdine>, Accessed December, 2021.
- [27] AdisInsight, SK-PC-B70M, <https://adisinsight.springer.com/drugs/800029407>, Accessed December, 2021.
- [28] Gauthier S, Feldman HH, Schneider LS, Wilcock GK, Frisoni GB, Hardlund JH, Moebius HJ, Bentham P, Kook KA, Wischik DJ, Schelter BO, Davis CS, Staff RT, Bracoud L, Shamsi K, Storey JMD, Harrington CR, Wischik CM (2016) Efficacy and safety of tau-aggregation inhibitor therapy in patients with mild or moderate Alzheimer's disease: a randomised, controlled, double-blind, parallel-arm, phase 3 trial. *Lancet* **388**, 2873–2884.
- [29] Alzheimer Research Forum, LMTM, <https://www.alzforum.org/therapeutics/lmtm>, Accessed December, 2021.
- [30] Alzheimer Research Forum, Encenicline, <https://www.alzforum.org/therapeutics/encenicline>, Accessed December, 2021.
- [31] Relkin NR, Thomas RG, Rissman RA, Brewer JB, Rafii MS, van Dyck CH, Jack CR, Sano M, Knopman DS, Raman R, Szabo P, Gelmont DM, Fritsch S, Aisen PS, Study ADC (2017) A phase 3 trial of IV immunoglobulin for Alzheimer disease. *Neurology* **88**, 1768–1775.
- [32] Alzheimer Research Forum, Gammagard®, <https://www.alzforum.org/therapeutics/gammagardr>, Accessed December, 2021.
- [33] Doody RS, Raman R, Farlow M, Iwatsubo T, Vellas B, Joffe S, Kieburtz K, He F, Sun X, Thomas RG, Aisen PS, Committee ADCSS, Siemers E, Sethuraman G, Mohs R, Semagacestat Study Group (2013) A phase 3 trial of semagacestat for treatment of Alzheimer's disease. *N Engl J Med* **369**, 341–350.
- [34] Alzheimer Research Forum, Semagacestat, <https://www.alzforum.org/therapeutics/semagacestat>, Accessed December, 2021.
- [35] Decourt B, Drumm-Gurnee D, Wilson J, Jacobson S, Belden C, Sirrel S, Ahmadi M, Shill H, Powell J, Walker A, Gonzales A, Macias M, Sabbagh MN (2017) Poor safety and

- tolerability hamper reaching a potentially therapeutic dose in the use of thalidomide for Alzheimer's disease: results from a double-blind, placebo-controlled trial. *Curr Alzheimer Res* **14**, 403–411.
- [36] Molloy DW, Standish TI, Zhou Q, Guyatt G, Group DS (2013) A multicenter, blinded, randomized, factorial controlled trial of doxycycline and rifampin for treatment of Alzheimer's disease: the DARAD trial. *Int J Geriatr Psychiatry* **28**, 463–470.
- [37] Salloway S, Sperling R, Fox NC, Blennow K, Klunk W, Raskind M, Sabbagh M, Honig LS, Porsteinsson AP, Ferris S, Reichert M, Ketter N, Nejadnik B, Guenzler V, Miloslavsky M, Wang D, Lu Y, Lull J, Tudor IC, Liu E, Grundman M, Yuen E, Black R, Brashear HR, Bapineuzumab 301 and 302 Clinical Trial Investigators (2014) Two phase 3 trials of bapineuzumab in mild-to-moderate Alzheimer's disease. *N Engl J Med* **370**, 322–333.
- [38] Liu E, Schmidt ME, Margolin R, Sperling R, Koeppe R, Mason NS, Klunk WE, Mathis CA, Salloway S, Fox NC, Hill DL, Les AS, Collins P, Gregg KM, Di J, Lu Y, Tudor IC, Wyman BT, Booth K, Broome S, Yuen E, Grundman M, Brashear HR, Bapineuzumab 301 and 302 Clinical Trial Investigators (2015) Amyloid- $\beta$  11C-PiB-PET imaging results from 2 randomized bapineuzumab phase 3 AD trials. *Neurology* **85**, 692–700.
- [39] Alzheimer Research Forum, Bapineuzumab, <https://www.alzforum.org/therapeutics/bapineuzumab>, Accessed December, 2021.
- [40] Vandenberghe R, Rinne JO, Boada M, Katayama S, Scheltens P, Vellas B, Tuchman M, Gass A, Fiebach JB, Hill D, Lobello K, Li D, McRae T, Lucas P, Evans I, Booth K, Luscan G, Wyman BT, Hua L, Yang L, Brashear HR, Black RS, Bapineuzumab 3000 and 3001 Clinical Study Investigators (2016) Bapineuzumab for mild to moderate Alzheimer's disease in two global, randomized, phase 3 trials. *Alzheimers Res Ther* **8**, 18.
- [41] DeKosky ST, Williamson JD, Fitzpatrick AL, Kronmal RA, Ives DG, Saxton JA, Lopez OL, Burke G, Carlson MC, Fried LP, Kuller LH, Robbins JA, Tracy RP, Woolard NF, Dunn L, Snitz BE, Nahin RL, Furberg CD, Ginkgo Evaluation of Memory (GEM) Study Investigators (2008) Ginkgo biloba for prevention of dementia: a randomized controlled trial. *JAMA* **300**, 2253–2262.
- [42] Vellas B, Coley N, Ousset P-J, Berrut G, Dartigues J-F, Dubois B, Grandjean H, Pasquier F, Piette F, Robert P, Touchon J, Garnier P, Mathiex-Fortunet H, Andrieu S, GuidAge



- Study Group (2012) Long-term use of standardised Ginkgo biloba extract for the prevention of Alzheimer's disease (GuidAge): a randomised placebo-controlled trial. *Lancet Neurol* **11**, 851–859.
- [43] Gold M, Alderton C, Zvartau-Hind M, Egginton S, Saunders AM, Irizarry M, Craft S, Landreth G, Linnamägi U, Sawchak S (2010) Rosiglitazone monotherapy in mild-to-moderate Alzheimer's disease: results from a randomized, double-blind, placebo-controlled phase III study. *Dement Geriatr Cogn Disord* **30**, 131–146.
- [44] Harrington C, Sawchak S, Chiang C, Davies J, Donovan C, Saunders AM, Irizarry M, Jeter B, Zvartau-Hind M, van Dyck CH, Gold M (2011) Rosiglitazone does not improve cognition or global function when used as adjunctive therapy to AChE inhibitors in mild-to-moderate Alzheimer's disease: two phase 3 studies. *Curr Alzheimer Res* **8**, 592–606.
- [45] Sano M, Bell KL, Galasko D, Galvin JE, Thomas RG, van Dyck CH, Aisen PS (2011) A randomized, double-blind, placebo-controlled trial of simvastatin to treat Alzheimer disease. *Neurology* **77**, 556–563.
- [46] Wharton W, Baker LD, Gleason CE, Dowling M, Barnet JH, Johnson S, Carlsson C, Craft S, Asthana S (2011) Short-term hormone therapy with transdermal estradiol improves cognition for postmenopausal women with Alzheimer's disease: results of a randomized controlled trial. *J Alzheimers Dis* **26**, 495–505.
- [47] Alzheimer Research Forum, Estrogen, <https://www.alzforum.org/therapeutics/estrogen>, Accessed December, 2021.
- [48] Pfizer (2010) *Pfizer and Medivation Announce Results From Two Phase 3 Studies in Dimebon (Latrepidine) Alzheimer's Disease Clinical Development Program*. [https://www.pfizer.com/news/press-release/press-release-detail/pfizer\\_and\\_medivation\\_announce\\_results\\_from\\_two\\_phase\\_3\\_studies\\_in\\_dimebon\\_latrepirdine\\_alzheimer\\_s\\_disease\\_clinical\\_development\\_program](https://www.pfizer.com/news/press-release/press-release-detail/pfizer_and_medivation_announce_results_from_two_phase_3_studies_in_dimebon_latrepirdine_alzheimer_s_disease_clinical_development_program), Accessed December, 2021.
- [49] Alzheimer Research Forum, Dimebon, <https://www.alzforum.org/therapeutics/dimebon>, Accessed December, 2021.
- [50] Sanofi (2016) *A randomized, multicenter, double-blind, placebo-controlled, 18-month study of the efficacy of xaliproden in patients with mild-to-moderate dementia of the Alzheimer's type (NCT00104013)*. <https://www.sanofi.com/-/media/Project/One-Sanofi->

- Web/Websites/Global/Sanofi-COM/Home/common/docs/clinical-study-results/efc2724-summary.pdf, Accessed December, 2021.
- [51] Porzner M, Müller T, Seufferlein T (2009) SR 57746A/xaliproden, a non-peptide neurotrophic compound: prospects and constraints for the treatment of nervous system diseases. *Expert Opin Investig Drugs* **18**, 1765–1772.
- [52] Sanofi (2016) *A randomized, multicenter, double-blind, placebo-controlled, 18-month study of the efficacy of xaliproden in patients with mild-to-moderate dementia of the Alzheimer's type (NCT00103649)*. <https://www.sanofi.com/-/media/Project/One-Sanofi-Web/Websites/Global/Sanofi-COM/Home/common/docs/clinical-study-results/efc2946-summary.pdf>, Accessed December, 2021.
- [53] AdisInsight, Leczotan, <https://adisinsight.springer.com/drugs/800019708>, Accessed December, 2021.
- [54] Mohs RC, Shiovitz TM, Tariot PN, Porsteinsson AP, Baker KD, Feldman PD (2009) Atomoxetine augmentation of cholinesterase inhibitor therapy in patients with Alzheimer disease: 6-month, randomized, double-blind, placebo-controlled, parallel-trial study. *Am J Geriatr Psychiatry* **17**, 752–759.
- [55] Alzheimer Research Forum, Atomoxetine, <https://www.alzforum.org/therapeutics/atomoxetine>, Accessed December, 2021.
- [56] Green RC, Schneider LS, Amato DA, Beelen AP, Wilcock G, Swabb EA, Zavitz KH, Tarenflurbil Phase 3 Study Group (2009) Effect of tarenflurbil on cognitive decline and activities of daily living in patients with mild Alzheimer disease: a randomized controlled trial. *JAMA* **302**, 2557–2564.
- [57] Alzheimer Research Forum, Tarenflurbil, <https://www.alzforum.org/therapeutics/flurizan>, Accessed December, 2021.
- [58] Feldman HH, Doody RS, Kivipelto M, Sparks DL, Waters DD, Jones RW, Schwam E, Schindler R, Hey-Hadavi J, DeMicco DA, Breazna A, LEADe Investigators (2010) Randomized controlled trial of atorvastatin in mild to moderate Alzheimer disease: LEADe. *Neurology* **74**, 956–964.
- [59] de Jong D, Jansen R, Hoefnagels W, Jellesma-Eggenkamp M, Verbeek M, Borm G, Kremer B (2008) No effect of one-year treatment with indomethacin on Alzheimer's disease progression: a randomized controlled trial. *PLoS One* **3**, e1475–e1475.

- [60] Lyketsos CG, Breitner JCS, Green RC, Martin BK, Meinert C, Piantadosi S, Sabbagh M (2007) Naproxen and celecoxib do not prevent AD in early results from a randomized controlled trial. *Neurology* **68**, 1800–1808.
- [61] Group AR, Martin BK, Szekely C, Brandt J, Piantadosi S, Breitner JCS, Craft S, Evans D, Green R, Mullan M (2008) Cognitive function over time in the Alzheimer’s Disease Anti-inflammatory Prevention Trial (ADAPT): results of a randomized, controlled trial of naproxen and celecoxib. *Arch Neurol* **65**, 896–905.
- [62] Group A-FR (2015) Follow-up evaluation of cognitive function in the randomized Alzheimer’s Disease Anti-inflammatory Prevention Trial and its follow-up study. *Alzheimers Dement* **11**, 216–25.e1.
- [63] Aisen PS, Gauthier S, Ferris SH, Saumier D, Haine D, Garceau D, Duong A, Suhy J, Oh J, Lau WC, Sampalis J (2011) Tramiprosate in mild-to-moderate Alzheimer’s disease - a randomized, double-blind, placebo-controlled, multi-centre study (the Alphase Study). *Arch Med Sci* **7**, 102–111.
- [64] Alzheimer Research Forum, Alzhemed™, <https://www.alzforum.org/therapeutics/alzhemedtm>, Accessed December, 2021.
- [65] Henderson VW, Ala T, Sainani KL, Bernstein AL, Stephenson BS, Rosen AC, Farlow MR (2015) Raloxifene for women with Alzheimer disease: A randomized controlled pilot trial. *Neurology* **85**, 1937–1944.
- [66] Steyer R (2004) Forest Labs Off on Alzheimer’s Bust. *TheStreet*. <https://www.thestreet.com/investing/stocks/forest-labs-off-on-alzheimers-bust-10180912>, Accessed December, 2021.
- [67] Biogen (2021) *Biogen Announces Topline Results From Phase 2 Study of Gosuranemab, an Anti-Tau Antibody, for Alzheimer’s Disease*. <http://media.biogen.com/news-releases/news-release-details/biogen-announces-topline-results-phase-2-study-gosuranemab-anti>, Accessed December, 2021.
- [68] Alzheimer Research Forum, Tilavonemab, <https://www.alzforum.org/therapeutics/tilavonemab>, Accessed December, 2021.
- [69] Alzheimer Research Forum, Zagotenemab, <https://www.alzforum.org/therapeutics/zagotenemab>, Accessed December, 2021.
- [70] AdisInsight, DCB-AD1, <https://adisinsight.springer.com/drugs/800044401>, Accessed

December, 2021.

- [71] AdisInsight, Rilapladib - GlaxoSmithKline, <https://adisinsight.springer.com/drugs/800018454>, Accessed December, 2021.
- [72] Alzheimer Research Forum, Saracatinib, <https://www.alzforum.org/therapeutics/saracatinib>, Accessed December, 2021.
- [73] Alzheimer Research Forum, LY3202626, <https://www.alzforum.org/therapeutics/ly3202626>, Accessed December, 2021.
- [74] Frölich L, Wunderlich G, Thamer C, Roehrl M, Garcia MJ, Dubois B (2019) Evaluation of the efficacy, safety and tolerability of orally administered BI 409306, a novel phosphodiesterase type 9 inhibitor, in two randomised controlled phase II studies in patients with prodromal and mild Alzheimer's disease. *Alzheimers Res Ther* **11**, 18.
- [75] Alzheimer Research Forum, BI 409306, <https://www.alzforum.org/therapeutics/bi-409306#:~:text=BI%20409306%20is%20an%20inhibitor,neurotransmitters%20nitric%20oxide%20and%20glutamate.>, Accessed December, 2021.
- [76] AdisInsight, DB 105, <https://adisinsight.springer.com/drugs/800029247>, Accessed December, 2021.
- [77] Bernard K, Gouttefangeas S, Bretin S, Galtier S, Robert P, Holthoff-Detto V, Cummings J, Pueyo M (2019) A 24-week double-blind placebo-controlled study of the efficacy and safety of the AMPA modulator S47445 in patients with mild to moderate Alzheimer's disease and depressive symptoms. *Alzheimers Dement (N Y)* **5**, 231–240.
- [78] Alzheimer Research Forum, S47445, <https://www.alzforum.org/therapeutics/s47445#:~:text=S47445%20is%20being%20developed%20for,previously%20generated%20CX516%2C%20now%20discontinued.>, Accessed December, 2021.
- [79] Alzheimer Research Forum, Exenatide, <https://www.alzforum.org/therapeutics/exenatide>, Accessed December, 2021.
- [80] Schneider LS, Geffen Y, Rabinowitz J, Thomas RG, Schmidt R, Ropele S, Weinstock M (2019) Low-dose ladostigil for mild cognitive impairment: A phase 2 placebo-controlled clinical trial. *Neurology* **93**, e1474–e1484.
- [81] Alzheimer Research Forum, Ladostigil, <https://www.alzforum.org/therapeutics/ladostigil>, Accessed December, 2021.

- [82] Alzheimer Research Forum, MK-7622, <https://www.alzforum.org/therapeutics/mk-7622>, Accessed December, 2021.
- [83] Cummings JL, Zhong K, Kinney JW, Heaney C, Moll-Tudla J, Joshi A, Pontecorvo M, Devous M, Tang A, Bena J (2016) Double-blind, placebo-controlled, proof-of-concept trial of bexarotene in moderate Alzheimer's disease. *Alzheimers Res Ther* **8**, 1–9.
- [84] Fullerton T, Binneman B, David W, Delnomdedieu M, Kupiec J, Lockwood P, Mancuso J, Miceli J, Bell J (2018) A Phase 2 clinical trial of PF-05212377 (SAM-760) in subjects with mild to moderate Alzheimer's disease with existing neuropsychiatric symptoms on a stable daily dose of donepezil. *Alzheimers Res Ther* **10**, 38.
- [85] Alzheimer Research Forum, PF-05212377, <https://www.alzforum.org/therapeutics/pf-05212377>, Accessed December, 2021.
- [86] AdisInsight, VI-1121, <https://adisinsight.springer.com/drugs/800034968>, Accessed December, 2021.
- [87] Alzheimer Research Forum, CERE-110, <https://www.alzforum.org/therapeutics/cere-110>, Accessed December, 2021.
- [88] Nave S, Doody RS, Boada M, Grimmer T, Savola J-M, Delmar P, Pauly-Evers M, Nikolcheva T, Czech C, Borroni E, Ricci B, Dukart J, Mannino M, Carey T, Moran E, Gilaberte I, Muelhardt NM, Gerlach I, Santarelli L, Ostrowitzki S, Fontoura P (2017) Sembragiline in moderate Alzheimer's disease: results of a randomized, double-blind, placebo-controlled phase II trial (MAYFLOWER RoAD). *J Alzheimers Dis* **58**, 1217–1228.
- [89] Alzheimer Research Forum, Sembragiline, <https://www.alzforum.org/therapeutics/sembragiline>, Accessed December, 2021.
- [90] AdisInsight, ST101, <https://adisinsight.springer.com/drugs/800019838>, Accessed December, 2021.
- [91] Grove RA, Harrington CM, Mahler A, Beresford I, Maruff P, Lowy MT, Nicholls AP, Boardley RL, Berges AC, Nathan PJ, Horrigan JP (2014) A randomized, double-blind, placebo-controlled, 16-week study of the H3 receptor antagonist, GSK239512 as a monotherapy in subjects with mild-to-moderate Alzheimer's disease. *Curr Alzheimer Res* **11**, 47–58.
- [92] Alzheimer Research Forum, GSK239512, <https://www.alzforum.org/therapeutics/gsk239512>, Accessed December, 2021.

- [93] Schneeberger A, Hendrix S, Mandler M, Ellison N, Bürger V, Brunner M, Frölich L, Mimica N, Hort J, Rainer M, Imarhiagbe D, Kurz A, Peters O, Gertz H-J, Tierney L, Mattner F, Schmidt W, Dubois B (2015) Results from a phase II study to assess the clinical and immunological activity of AFFITOPE® AD02 in patients with early Alzheimer's disease. *J Prev Alzheimers Dis* **2**, 103–114.
- [94] Alzheimer Research Forum, Affitope AD02, <https://www.alzforum.org/therapeutics/affitope-ad02>, Accessed December, 2021.
- [95] AdisInsight, Ispronicline, <https://adisinsight.springer.com/drugs/800011083>, Accessed December, 2021.
- [96] Frölich L, Ashwood T, Nilsson J, Eckerwall G (2011) Effects of AZD3480 on cognition in patients with mild-to-moderate Alzheimer's disease: a phase IIb dose-finding study. *J Alzheimers Dis* **24**, 363–374.
- [97] Humanetics Corporation, NIC5-15, <https://www.humaneticscorp.com/pipeline>, Accessed December, 2021.
- [98] Gault LM, Lenz RA, Ritchie CW, Meier A, Othman AA, Tang Q, Berry S, Pritchett Y, Robieson WZ (2016) ABT-126 monotherapy in mild-to-moderate Alzheimer's dementia: randomized double-blind, placebo and active controlled adaptive trial and open-label extension. *Alzheimers Res Ther* **8**, 44.
- [99] Florian H, Meier A, Gauthier S, Lipschitz S, Lin Y, Tang Q, Othman AA, Robieson WZ, Gault LM (2016) Efficacy and safety of ABT-126 in subjects with mild-to-moderate Alzheimer's disease on stable doses of acetylcholinesterase inhibitors: a randomized, double-blind, placebo-controlled study. *J Alzheimers Dis* **51**, 1237–1247.
- [100] Alzheimer Research Forum, Nelonicline, <https://www.alzforum.org/therapeutics/nelonicline>, Accessed December, 2021.
- [101] Haig GM, Pritchett Y, Meier A, Othman AA, Hall C, Gault LM, Lenz RA (2014) A randomized study of H3 antagonist ABT-288 in mild-to-moderate Alzheimer's dementia. *J Alzheimers Dis* **42**, 959–971.
- [102] Alzheimer Research Forum, ABT-288, <https://www.alzforum.org/therapeutics/abt-288>, Accessed December, 2021.
- [103] Marek GJ, Katz DA, Meier A, Greco N 4th, Zhang W, Liu W, Lenz RA (2014) Efficacy and safety evaluation of HSD-1 inhibitor ABT-384 in Alzheimer's disease. *Alzheimers*

- Dement* **10**, S364-73.
- [104] Alzheimer Research Forum, ABT-384, <https://www.alzforum.org/therapeutics/abt-384>, Accessed December, 2021.
- [105] Schwam EM, Nicholas T, Chew R, Billing CB, Davidson W, Ambrose D, Altstiel LD (2014) A multicenter, double-blind, placebo-controlled trial of the PDE9A inhibitor, PF-04447943, in Alzheimer's disease. *Curr Alzheimer Res* **11**, 413–421.
- [106] AdisInsight, PF-04447943, <https://adisinsight.springer.com/drugs/800028797>, Accessed December, 2021.
- [107] Pasquier F, Sadowsky C, Holstein A, Leterme GLP, Peng Y, Jackson N, Fox NC, Ketter N, Liu E, Ryan JM (2016) Two phase 2 multiple ascending-dose studies of vanutide cridifcar (ACC-001) and QS-21 adjuvant in mild-to-moderate Alzheimer's disease. *J Alzheimers Dis* **51**, 1131–1143.
- [108] Alzheimer Research Forum, Vanutide cridifcar, <https://www.alzforum.org/therapeutics/vanutide-cridifcar>, Accessed December, 2021.
- [109] Eli Lilly (2013) *Lilly Voluntarily Terminates Phase II Study for LY2886721, a Beta Secretase Inhibitor, Being Investigated as a Treatment for Alzheimer's Disease*. <https://investor.lilly.com/news-releases/news-release-details/lilly-voluntarily-terminates-phase-ii-study-ly2886721-beta>, Accessed December, 2021.
- [110] AdisInsight, SAR 110894, <https://adisinsight.springer.com/drugs/800025936>, Accessed December, 2021.
- [111] Coric V, van Dyck CH, Salloway S, Andreasen N, Brody M, Richter RW, Soininen H, Thein S, Shiovitz T, Pilcher G, Colby S, Rollin L, Dockens R, Pachai C, Portelius E, Andreasson U, Blennow K, Soares H, Albright C, Feldman HH, Berman RM (2012) Safety and tolerability of the  $\gamma$ -secretase inhibitor avagacestat in a phase 2 study of mild to moderate Alzheimer disease. *Arch Neurol* **69**, 1430–1440.
- [112] Coric V, Salloway S, van Dyck CH, Dubois B, Andreasen N, Brody M, Curtis C, Soininen H, Thein S, Shiovitz T, Pilcher G, Ferris S, Colby S, Kerselaers W, Dockens R, Soares H, Kaplita S, Luo F, Pachai C, Bracoud L, Mintun M, Grill JD, Marek K, Seibyl J, Cedarbaum JM, Albright C, Feldman HH, Berman RM (2015) Targeting prodromal Alzheimer disease with avagacestat: a randomized clinical trial. *JAMA Neurol* **72**, 1324–1333.

- [113] Alzheimer Research Forum, Avagacestat, <https://www.alzforum.org/therapeutics/avagacestat>, Accessed December, 2021.
- [114] Lovestone S, Boada M, Dubois B, Hüll M, Rinne JO, Huppertz H-J, Calero M, Andrés M V, Gómez-Carrillo B, León T, del Ser T (2015) A phase II trial of tideglusib in Alzheimer's disease. *J Alzheimers Dis* **45**, 75–88.
- [115] Alzheimer Research Forum, Tideglusib, <https://www.alzforum.org/therapeutics/tideglusib>, Accessed December, 2021.
- [116] Egan M, Yaari R, Liu L, Ryan M, Peng Y, Lines C, Michelson D (2012) Pilot randomized controlled study of a histamine receptor inverse agonist in the symptomatic treatment of AD. *Curr Alzheimer Res* **9**, 481–490.
- [117] AdisInsight, MK 0249, <https://adisinsight.springer.com/drugs/800024706>, Accessed December, 2021.
- [118] Alzheimer Research Forum, Lornoxicam, <https://www.alzforum.org/therapeutics/lornoxicam>, Accessed December, 2021.
- [119] Alzheimer Research Forum, Ponezumab, <https://www.alzforum.org/therapeutics/ponezumab>, Accessed December, 2021.
- [120] Alzheimer Research Forum, AZD1446, <https://www.alzforum.org/therapeutics/azd1446>, Accessed December, 2021.
- [121] AdisInsight, Cerlapirdine, <https://adisinsight.springer.com/drugs/800025908>, Accessed December, 2021.
- [122] Kim SY, Choi SH, Rollema H, Schwam EM, McRae T, Dubrava S, Jacobsen J (2014) Phase II crossover trial of varenicline in mild-to-moderate Alzheimer's disease. *Dement Geriatr Cogn Disord* **37**, 232–245.
- [123] Alzheimer Research Forum, Varenicline, <https://www.alzforum.org/therapeutics/varenicline>, Accessed December, 2021.
- [124] Salloway S, Sperling R, Keren R, Porsteinsson AP, van Dyck CH, Tariot PN, Gilman S, Arnold D, Abushakra S, Hernandez C, Crans G, Liang E, Quinn G, Bairu M, Pastrak A, Cedarbaum JM (2011) A phase 2 randomized trial of ELND005, scyllo-inositol, in mild to moderate Alzheimer disease. *Neurology* **77**, 1253–1262.
- [125] AdisInsight, RG3487, <https://adisinsight.springer.com/drugs/800022293>, Accessed December, 2021.



- [126] Lenz RA, Pritchett YL, Berry SM, Llano DA, Han S, Berry DA, Sadowsky CH, Abi-Saab WM, Saltarelli MD (2015) Adaptive, dose-finding phase 2 trial evaluating the safety and efficacy of ABT-089 in mild to moderate Alzheimer disease. *Alzheimer Dis Assoc Disord* **29**, 192–199.
- [127] AdisInsight, Pozanicline, <https://adisinsight.springer.com/drugs/800006779>, Accessed December, 2021.
- [128] AdisInsight, Etazolate, <https://adisinsight.springer.com/drugs/800016925>, Accessed December, 2021.
- [129] AdisInsight, Radequinil, <https://adisinsight.springer.com/drugs/800010724>, Accessed December, 2021.
- [130] Sevigny JJ, Ryan JM, van Dyck CH, Peng Y, Lines CR, Nessly ML (2008) Growth hormone secretagogue MK-677: no clinical effect on AD progression in a randomized trial. *Neurology* **71**, 1702–1708.
- [131] AdisInsight, HF0220, <https://adisinsight.springer.com/drugs/800016847>, Accessed December, 2021.
- [132] ClinicalTrials.gov, Clinical pharmacology and therapeutics, Effect on Cognitive Performance and Safety/Tolerability of SSR180711C in Mild Alzheimer’s Disease, <https://clinicaltrials.gov/ct2/show/NCT00602680?term=NCT00602680&draw=2&rank=1>, Accessed December, 2021.
- [133] AdisInsight, MK 0952, <https://adisinsight.springer.com/drugs/800024701>, Accessed December, 2021.
- [134] AdisInsight, Drinabant - Opiant Pharmaceuticals, <https://adisinsight.springer.com/drugs/800020616>, Accessed December, 2021.
- [135] AdisInsight, GTS 21, <https://adisinsight.springer.com/drugs/800005633>, Accessed December, 2021.
- [136] Alzheimer Research Forum, MEM 1003, <https://www.alzforum.org/therapeutics/mem-1003>, Accessed December, 2021.
- [137] Alzheimer Research Forum, SGS 742, <https://www.alzforum.org/therapeutics/sgs-742>, Accessed December, 2021.
- [138] Alzheimer Research Forum, Rember TM, <https://www.alzforum.org/therapeutics/remember-tm>, Accessed December, 2021.

- [139] AdisInsight, Arundic acid, <https://adisinsight.springer.com/drugs/800011094>, Accessed December, 2021.
- [140] AdisInsight, Paliroden, <https://adisinsight.springer.com/drugs/800013042>, Accessed December, 2021.
- [141] Astellas (2006) *Astellas Discontinues Development of Alzheimer's Disease Compound FK962*. [https://www.astellas.com/system/files/news/2018-06/060718-1\\_eg\\_0.pdf](https://www.astellas.com/system/files/news/2018-06/060718-1_eg_0.pdf), Accessed December, 2021.
- [142] Alzheimer Research Forum, CX516, <https://www.alzforum.org/therapeutics/cx516>, Accessed December, 2021.
- [143] Alzheimer Research Forum, NS2330, <https://www.alzforum.org/therapeutics/ns2330>, Accessed December, 2021.
- [144] ClinicalTrials.gov, Mifepristone as Adjunctive Therapy in Alzheimer's Disease, <https://clinicaltrials.gov/ct2/results?cond=&term=NCT00105105&cntry=&state=&city=&dist=>, Accessed December, 2021.
- [145] AdisInsight, Mifepristone - Corcept Therapeutics, <https://adisinsight.springer.com/drugs/800001657>, Accessed December, 2021.
